# Supplementary material for: Exposure to Disinfectants and Cleaning Products and Respiratory Health of Workers and Children in Daycares: The CRESPI Cohort Protocol
Source: MDPI journal article supplement (doi:10.3390/ijerph20105903), 2023-05-21
Supplement: s1 [file s1]

Figure S1. Various steps of the set-up of the CRESPI study

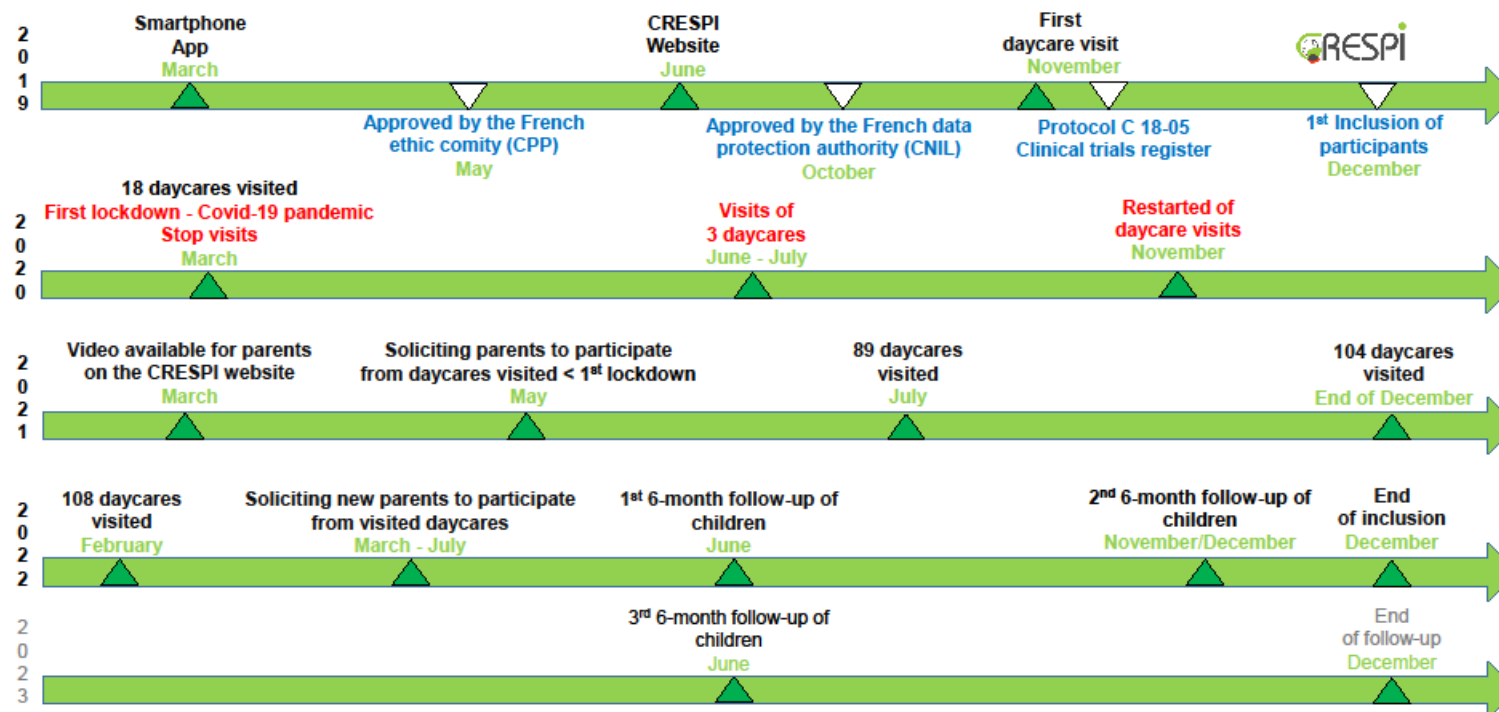

**Figure S2. Databases available in the CRESPI cohort**

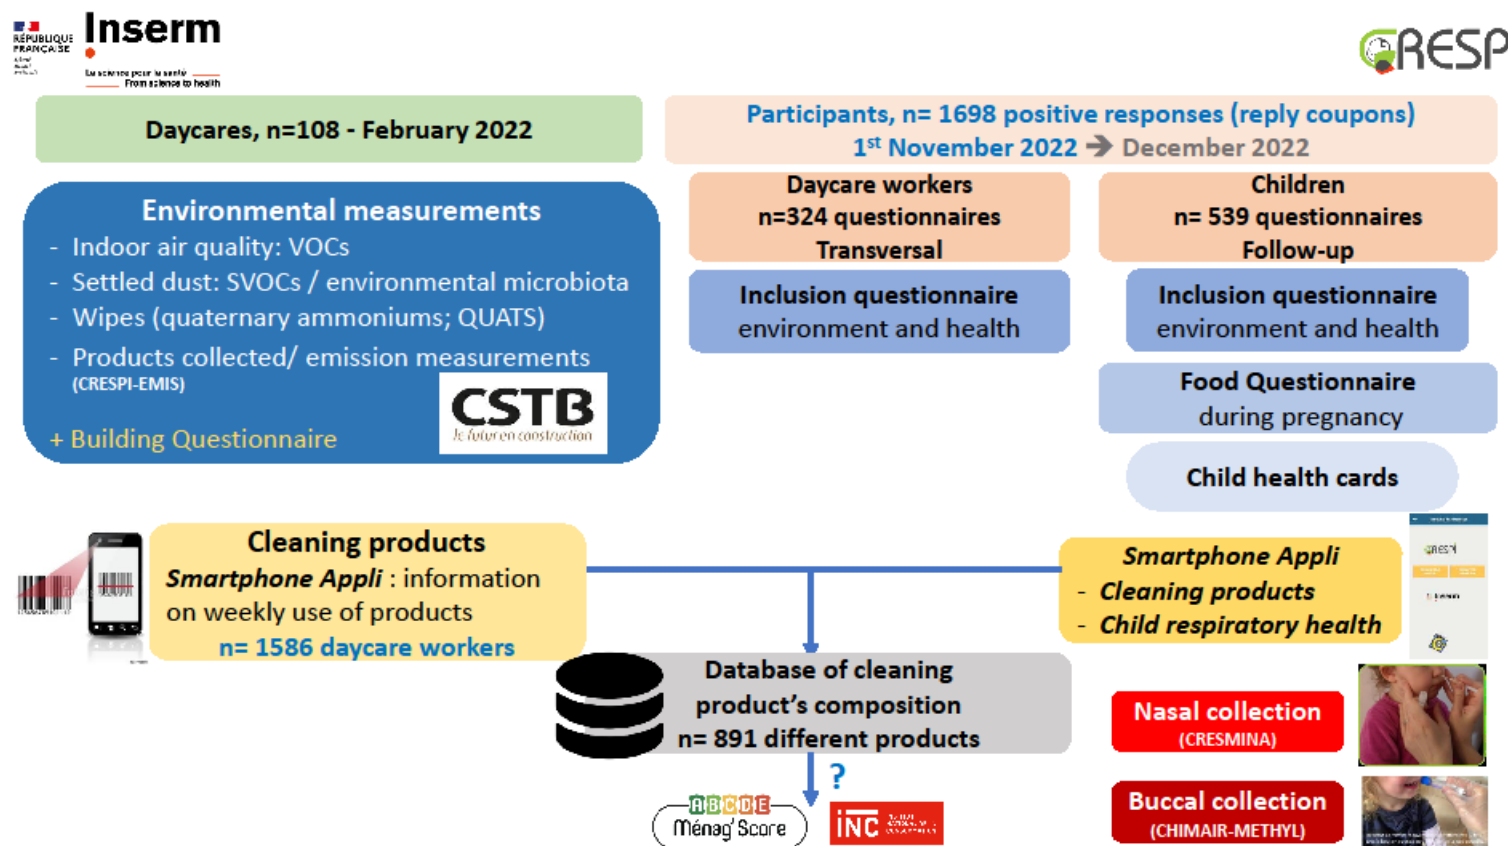

**Table S1. Extract of the cleaning products' composition database**

| Barcode<br>GENCOD | Product category           | Form   | Ingredient<br>1 | Ingredient 2                 | Ingredient 3           |
|-------------------|----------------------------|--------|-----------------|------------------------------|------------------------|
| 1 017 496         | Hand soap                  | Liquid | Water           | Disodium lauroamphodiacetate | Sodium Lauryl Sulfate  |
| 7 270 178         | Hand soap                  | Liquid | Water           | Sodium Laureth Sulfate       | Cocamidopropyl betaine |
| 8 111 289         | Multi-surface disinfectant | Spray  | Water           | Ethanol                      | Isopropanol            |
| 8 231 228         | Dishwashing liquid         | Liquid | Water           | Calendula floral water       | Lavender floral water  |
| 8 692 603         | Hydroalcoholic gel         | Gel    | Ethanol         | Water                        | Glycerin               |
